# Supplementary material for: Transcriptional Regulation and Gene Mapping of Internode Elongation and Late Budding in the Chinese Cabbage Mutant lcc
Source: MDPI journal article supplement (doi:10.3390/plants13081083), 2024-04-12
Supplement: s1 [file s1]

**Table S1.** Distribution of SNP markers on F<sub>2</sub> map.

| <b>Chromosome</b> | <b>Marker number</b> | <b>Length/cM</b> |
|-------------------|----------------------|------------------|
| A01               | 134                  | 103.420          |
| A02               | 162                  | 144.177          |
| A03               | 241                  | 174.437          |
| A04               | 138                  | 98.519           |
| A05               | 178                  | 128.047          |
| A06               | 155                  | 137.941          |
| A07               | 157                  | 125.375          |
| A08               | 146                  | 92.235           |
| A09               | 206                  | 144.413          |
| A10               | 85                   | 111.7            |
| Total             | 1602                 | 1260.271         |
