# Supplementary material for: Transcriptional Regulation and Gene Mapping of Internode Elongation and Late Budding in the Chinese Cabbage Mutant lcc
Source: MDPI journal article supplement (doi:10.3390/plants13081083), 2024-04-12
Supplement: s1 [file s1]

**Table S3.** DEGs (differentially expressed genes) between *lcc* and R500 in the hormone regulatory pathway at seedling stage.

| Gene ID          | Gene name   | Gene ID          | Gene name   |
|------------------|-------------|------------------|-------------|
| BraA03g023790.3C | AGL20       | BraA02g035550.3C | SAUR        |
| BraA02g003340.3C | AGL25,FLC   | BraA03g008240.3C | SAUR        |
| BraA03g037500.3C | AHP4        | BraA03g008290.3C | SAUR        |
| BraA03g021580.3C | ARR16       | BraA03g008320.3C | SAUR        |
| BraA07g026930.3C | AUX1, LAX   | BraA07g002710.3C | SAUR        |
| BraA07g006070.3C | BAK1,SERK4  | BraA10g011930.3C | SAUR        |
| BraA08g028240.3C | BZR2        | BraA03g024140.3C | SPA1        |
| BraA05g001030.3C | CCA1        | BraA01g007440.3C | TCH4        |
| BraA02g043680.3C | CDF1        | BraA08g018140.3C | TCH4        |
| BraA02g005190.3C | CHS-1       | BraA03g044360.3C | TOC1, APRR1 |
| BraA03g005990.3C | CHS-2       |                  |             |
| BraA10g024990.3C | CHS-3       |                  |             |
| BraA10g002940.3C | CRY2        |                  |             |
| BraA07g031650.3C | TSF         |                  |             |
| BraA03g002880.3C | GA20OX3-1   |                  |             |
| BraA10g030020.3C | GA20OX3-2   |                  |             |
| BraA10g001200.3C | GA2OX6      |                  |             |
| BraA03g013900.3C | GH3.6       |                  |             |
| BraA09g040290.3C | GI          |                  |             |
| BraA05g040050.3C | GID1a       |                  |             |
| BraA09g052310.3C | GID1b       |                  |             |
| BraA02g003870.3C | HY5-1       |                  |             |
| BraA05g029990.3C | HY5-2       |                  |             |
| BraA08g010620.3C | IAA14       |                  |             |
| BraA04g032040.3C | JAR1-1      |                  |             |
| BraA05g001430.3C | JAR1-2      |                  |             |
| BraA02g021020.3C | JAZ         |                  |             |
| BraA03g005650.3C | JAZ         |                  |             |
| BraA05g029670.3C | JAZ         |                  |             |
| BraA06g015450.3C | ARF5-1      |                  |             |
| BraA08g028060.3C | ARF5-2      |                  |             |
| BraA04g030640.3C | PIF4        |                  |             |
| BraA04g032300.3C | PRR9-1      |                  |             |
| BraA05g001070.3C | PRR9-2      |                  |             |
| BraA09g006460.3C | RFWD2, COP1 |                  |             |
| BraA02g007410.3C | SAUR        |                  |             |
| BraA02g007430.3C | SAUR        |                  |             |
| BraA02g007480.3C | SAUR        |                  |             |
| BraA02g007500.3C | SAUR        |                  |             |
