# Supplementary material for: Transcriptional Regulation and Gene Mapping of Internode Elongation and Late Budding in the Chinese Cabbage Mutant lcc
Source: Plants (Basel). 2024 Apr 12;13(8):1083. doi: 10.3390/plants13081083 (PMC11053886; doi:10.3390/plants13081083)
Supplement: Supplementary file 1 [file plants-13-01083-s001.zip]

Archive with 5 entries (5 files):
- Figure S1.pdf
- Figure S2.pdf
- Table S1.pdf
- Table S2.xlsx
- Table S3.pdf
