# Supplementary material for: Transcriptional Regulation and Gene Mapping of Internode Elongation and Late Budding in the Chinese Cabbage Mutant lcc
Source: Plants (Basel). 2024 Apr 12;13(8):1083. doi: 10.3390/plants13081083 (PMC11053886; doi:10.3390/plants13081083)
Supplement: Supplementary file 1 [file plants-13-01083-s001.zip › Table S2.xlsx]

## Sheet: parental lines and F1
genotype	name	Hypocotyl length(HL)	Internode(IN)	Budding time(BT)	Leaf hair(LF)			NA represents no data
lcc	R01H02	15.14	1	NA	3
lcc	R01I02	7.89	1	NA	3
lcc	R01J02	11.83	1	NA	3
lcc	R01K02	11.66	1	NA	3
lcc	R02H04	13.04	1	NA	3
lcc	R02I04	17.2	1	NA	3
lcc	R02J04	10.41	1	NA	3
lcc	R02K04	9.73	1	NA	3
lcc	R05H09	13.45	1	NA	3
lcc	R05I09	18.02	1	NA	3
lcc	R05J09	18.93	1	NA	3
lcc	R05K09	11.67	1	NA	3
lcc	R06H02	15.7	1	NA	3
lcc	R06J02	13.58	1	NA	3
lcc	R06K02	11.56	1	NA	3
R500	R02H03	12	3	28	1
R500	R02I03	13.44	3	7	1
R500	R02J03	10.7	3	7	1
R500	R02K03	5.51	3	7	1
R500	R03H04	14.26	3	7	1
R500	R03I04	11.8	3	10	1
R500	R03J04	5.65	3	7	1
R500	R03K04	13.38	3	7	1
R500	R04I07	11.82	3	7	1
R500	R05H08	15.53	3	7	1
R500	R05J08	13.91	3	10	1
R500	R05K08	8.93	3	7	1
R500	R06I01	13.63	3	10	1
R500	R07H03	11.27	3	7	1
R500	R07K03	10.34	3	10	1
F1	R03H05	11.58	1	NA	3
F1	R03J05	11.8	1	NA	3

## Sheet: F2
genotype	name	Hypocotyl length(HL)	Internode(IN)	Budding time(BT)	Leaf hair(LF)		number	Internode(IN)	Leaf hair(LF)
F2	R01H03	16.63	1	NA	3		1	129	19
F2	R01H04	13.71	1	NA	3		2	11	37
F2	R01H05	17.14	1	NA	3		3	7	91
F2	R01H06	20.03	1	NA	3		NA	3	3
F2	R01H09	26.15	1	NA	3
F2	R01I04	10.52	1	NA	3
F2	R01I08	14.6	1	NA	1
F2	R01J03	13.6	1	NA	3
F2	R01J04	9.64	3	1	1
F2	R01K03	12.31	1	NA	3
F2	R01K04	10.11	1	NA	3
F2	R01K05	9.74	1	NA	3
F2	R01K07	10.91	1	41	3
F2	R02H01	25.05	1	69	3
F2	R02H02	13.86	1	NA	3
F2	R02H04	13.41	1	NA	3
F2	R02H05	10.65	1	28	1
F2	R02H08	24.24	2	62	NA
F2	R02I06	11.86	1	NA	3
F2	R02I08	8.57	1	21	3
F2	R02J01	17.21	1	85	3
F2	R02J06	10.52	1	85	1
F2	R02J07	10.25	1	NA	2
F2	R02J08	15.56	1	21	3
F2	R02J09	18.03	2	10	3
F2	R02K01	12.46	1	85	2
F2	R02K02	0.83	1	NA	3
F2	R02K05	12.98	1	62	1
F2	R02K06	7.71	1	NA	3
F2	R02K07	14.08	1	NA	2
F2	R02K08	8.9	1	NA	2
F2	R03H01	14.35	1	NA	3
F2	R03H02	15.28	1	NA	3
F2	R03H06	12.91	1	NA	3
F2	R03H07	13.34	1	41	3
F2	R03H08	18.75	1	90	3
F2	R03H09	11.79	1	NA	2
F2	R03I01	18.13	1	NA	3
F2	R03I02	12.11	1	NA	3
F2	R03I06	8.82	1	NA	3
F2	R03I07	12.96	3	1	2
F2	R03I08	10.84	3	1	2
F2	R03J01	4.62	1	85	1
F2	R03J03	15.28	1	7	3
F2	R03J06	20.45	1	NA	3
F2	R03J07	9.93	1	NA	3
F2	R03K02	13.2	1	NA	3
F2	R03K03	8.42	1	10	2
F2	R03K06	11.57	1	NA	3
F2	R03K08	12.48	1	85	2
F2	R03K09	15.45	1	41	3
F2	R04H04	15.64	1	85	3
F2	R04H05	14.26	1	NA	3
F2	R04H06	25.69	1	62	2
F2	R04H09	13.56	1	69	2
F2	R04I01	7.64	1	90	2
F2	R04I02	25	1	NA	3
F2	R04I03	9.32	1	NA	3
F2	R04I04	7.7	1	NA	3
F2	R04I08	12.61	1	NA	2
F2	R04J01	11.21	1	NA	3
F2	R04J02	13.44	1	NA	3
F2	R04J03	15.91	1	NA	1
F2	R04J04	17.52	1	21	3
F2	R04J05	14.35	1	41	3
F2	R04J08	18.82	1	85	2
F2	R04J09	14.76	1	85	2
F2	R04K01	21.8	1	49	3
F2	R04K02	17.17	1	85	2
F2	R04K03	9.96	1	NA	2
F2	R04K05	10.1	1	NA	2
F2	R04K06	19.16	1	7	2
F2	R04K09	13.66	3	10	3
F2	R05H01	8.39	1	47	2
F2	R05H02	9.11	3	1	2
F2	R05H03	9.28	1	NA	2
F2	R05H05	12.07	1	NA	2
F2	R05H06	9.99	1	NA	2
F2	R05I01	12.74	1	47	3
F2	R05I04	14.18	1	21	3
F2	R05I06	10.19	1	NA	2
F2	R05I07	11.39	2	85	3
F2	R05J01	13.43	1	1	3
F2	R05J02	12.73	1	33	3
F2	R05J03	20.79	1	62	3
F2	R05J04	17.28	1	NA	1
F2	R05J06	18.19	1	62	3
F2	R05J07	19.92	1	85	1
F2	R05K01	17.77	1	85	2
F2	R05K02	15.31	1	21	3
F2	R05K05	16.27	2	1	1
F2	R05K06	8.62	1	NA	2
F2	R05K07	12.95	2	85	3
F2	R06H03	22.7	2	21	2
F2	R06H04	15.66	1	NA	1
F2	R06H05	18.95	1	NA	2
F2	R06H07	16.23	1	33	1
F2	R06H09	18.88	1	NA	3
F2	R06I03	10.75	1	NA	3
F2	R06I04	16.06	1	NA	3
F2	R06I05	10.2	1	NA	3
F2	R06I06	14.81	1	NA	3
F2	R06I07	11.77	1	41	2
F2	R06I08	NA	NA	NA	3
F2	R06J03	12.28	1	85	NA
F2	R06J07	12.51	1	NA	3
F2	R06J08	9.32	2	NA	2
F2	R06K03	12.44	1	NA	2
F2	R06K04	9.11	1	85	3
F2	R06K05	8.06	1	41	3
F2	R06K06	9.91	1	90	3
F2	R06K08	12.41	1	7	3
F2	R06K09	11.84	3	1	3
F2	R07H04	13.66	1	90	3
F2	R07H06	11.46	2	1	3
F2	R07H07	9.56	3	21	1
F2	R07I01	7.66	1	NA	3
F2	R07I06	10.29	1	NA	3
F2	R07I07	18.15	1	NA	2
F2	R07J05	3.05	1	62	3
F2	R07J06	10.76	1	NA	1
F2	R07J08	16.53	1	81	3
F2	R07K02	13.34	2	NA	3
F2	R07K05	15.18	1	7	2
F2	R07K09	16.16	1	NA	3
F2	R08H01	13.23	1	90	1
F2	R08H02	16.33	1	69	3
F2	R08H03	14.41	1	NA	3
F2	R08H04	10.28	1	47	2
F2	R08H05	18.82	1	NA	3
F2	R08H07	13.08	1	NA	3
F2	R08H08	14.55	1	90	1
F2	R08H09	27.93	1	62	3
F2	R08I01	13.39	1	62	3
F2	R08I03	10.08	1	85	3
F2	R08I05	17.97	1	NA	3
F2	R08I06	20.11	1	NA	3
F2	R08I07	21.36	1	NA	3
F2	R08I08	9.45	2	1	1
F2	R08J01	13.07	1	NA	1
F2	R08J02	18.57	1	85	3
F2	R08J03	12.45	1	NA	1
F2	R08J05	9.76	2	NA	3
F2	R08J06	8.86	1	85	3
F2	R08J07	13.14	1	85	2
F2	R08J08	14.62	1	NA	2
F2	R08K01	10.57	1	NA	3
F2	R08K02	11.74	1	NA	3
F2	R08K06	17.54	NA	69	3
F2	R08K09	NA	NA	NA	NA

## Sheet: HL of lcc and A03
lcc	A03
15.14	8.4
7.89	6.6
11.83	5.2
11.66	7.4
13.04	5.4
17.2	8.6
10.41	7.2
9.73	8.3
13.45	5.8
18.02	6.6
18.93	7.2
11.67	4.2
15.7	8.8
13.58	8.4
11.56	8.2
