# Supplementary figures and images for: Transcriptional Regulation and Gene Mapping of Internode Elongation and Late Budding in the Chinese Cabbage Mutant lcc
Source: MDPI journal article supplement (doi:10.3390/plants13081083), 2024-04-12

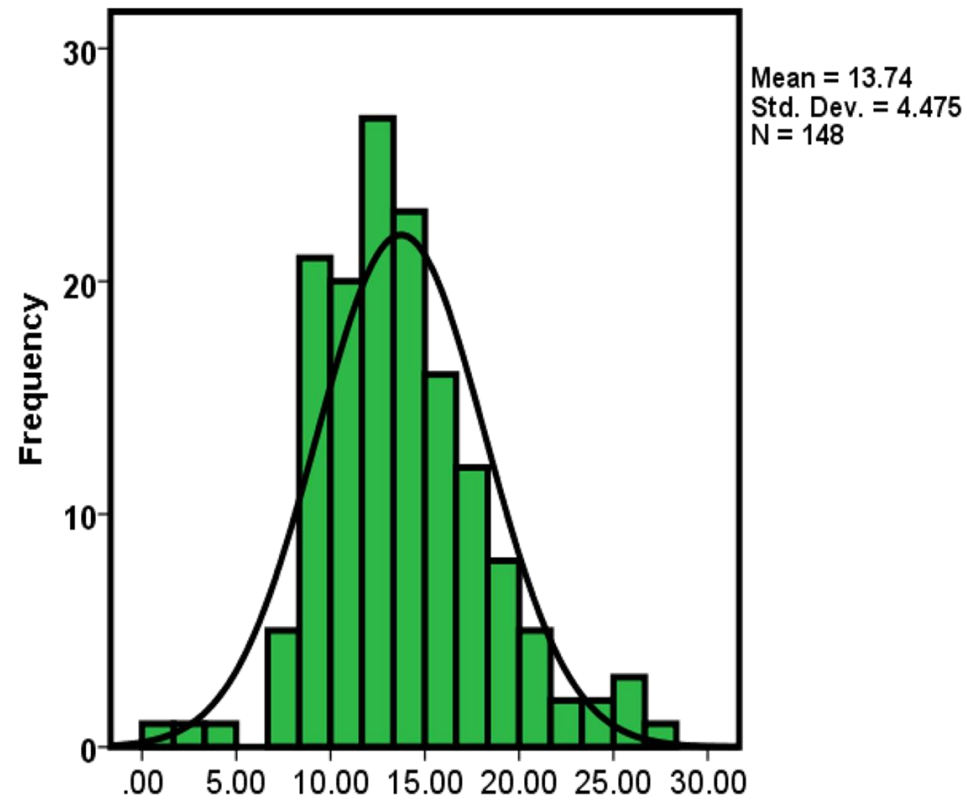

**Figure S1. Distribution of hypocotyl length in F<sub>2</sub> population.**

Supplement: s1 [file s1]

# A01-A10

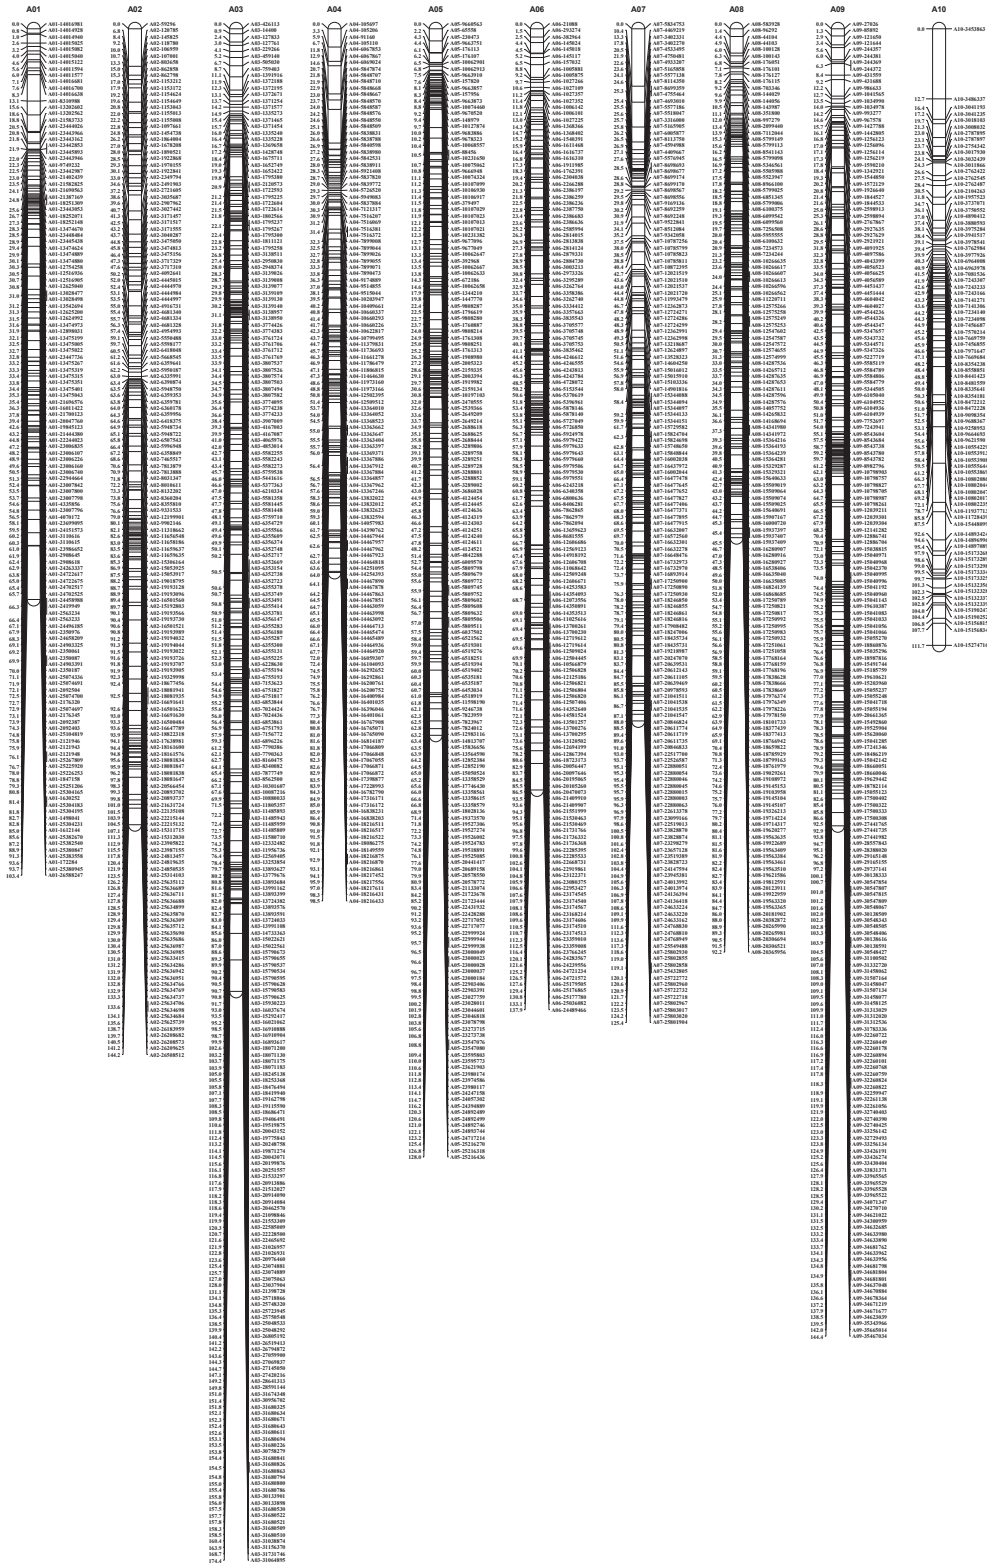

Figure S2. Distribution of SNP markers on genetic linkage map.

Supplement: s1 [file s1]
